# Supplementary material for: Takeaway meal consumption and risk markers for coronary heart disease, type 2 diabetes and obesity in children aged 9–10 years: a cross-sectional study
Source: PubMed Central journal article supplement (PMC5916105; doi:10.1136/archdischild-2017-312981), 2017-12-03
Supplement: archdischild-2017-312981supp001.pdf [file archdischild-2017-312981supp001.pdf]

**Supplementary Table 1:** Frequency of takeaway meal consumption in 1948 children; by sex, ethnic group and socioeconomic status

|                         | Frequency of takeaway meal consumption |      |              |        |             |        | p (no difference) |
|-------------------------|----------------------------------------|------|--------------|--------|-------------|--------|-------------------|
|                         | Never, hardly ever                     |      | < 1 per week |        | ≥1 per week |        |                   |
|                         | Frequency                              | (%)  | Frequency    | (%)    | Frequency   | (%)    |                   |
| All children (n=1948)   | 499                                    | (26) | 894          | (46)   | 555         | (28)   | 0.001             |
| Boys                    | 217                                    | (24) | 411          | (44)   | 297         | (32)   |                   |
| Girls                   | 282                                    | (28) | 483          | (47)   | 258         | (25)   |                   |
| white European          | 135                                    | (28) | 226          | (48)   | 114         | (24)   | 0.72              |
| Black African Caribbean | 106                                    | (21) | 232          | (47)   | 158         | (32)   |                   |
| South Asian             | 121                                    | (24) | 223          | (45)   | 151         | (31)   |                   |
| Other ethnicity         | 137                                    | (29) | 213          | (44)   | 132         | (27)   |                   |
| Managerial              | 135                                    | (26) | 258          | (51)   | 115         | (23)   |                   |
| Intermediate            | 118                                    | (25) | 232          | (49)   | 127         | (26)   | 0.008             |
| Routine & manual        | 141                                    | (25) | 247          | (43)   | 181         | (32)   |                   |
| Inactive                | 85                                     | (28) | 124          | (40)   | 99          | (32)   |                   |
| Unclassified/missing    | 20                                     | (23) | 33           | (38.5) | 33          | (38.5) |                   |
